# Supplementary material for: Epicardial placement of human MSC-loaded fibrin sealant films for heart failure: Preclinical efficacy and mechanistic data
Source: PubMed Central journal article supplement (PMC8353205; doi:10.1016/j.ymthe.2021.04.018), 2021-04-20
Supplement: mmc1.pdf [file mmc1.pdf]

## **Supplemental Information**

### **Epicardial placement of human MSC-loaded**

### **fibrin sealant films for heart failure:**

### **Preclinical efficacy and mechanistic data**

**Laura Fields, Tomoya Ito, Kazuya Kobayashi, Yuki Ichihara, Mihai-Nicolae Podaru, Mohsin Hussain, Kizuku Yamashita, Vanessa Machado, Fiona Lewis-McDougall, and Ken Suzuki**

## **SUPPLEMENTAL INFORMATION**

### **Epicardial Placement of Fibrin Sealant Film-incorporating Human Mesenchymal Stromal Cells for the Treatment of Heart Failure: Towards Clinical Translation and Mechanistic Implication**

Short Title: Fields et al. MSC-Dressing Therapy

Supplemental Information includes:

- Supplemental Figures S1-S8 with legends
- Supplemental Table S1

**Figure S1**

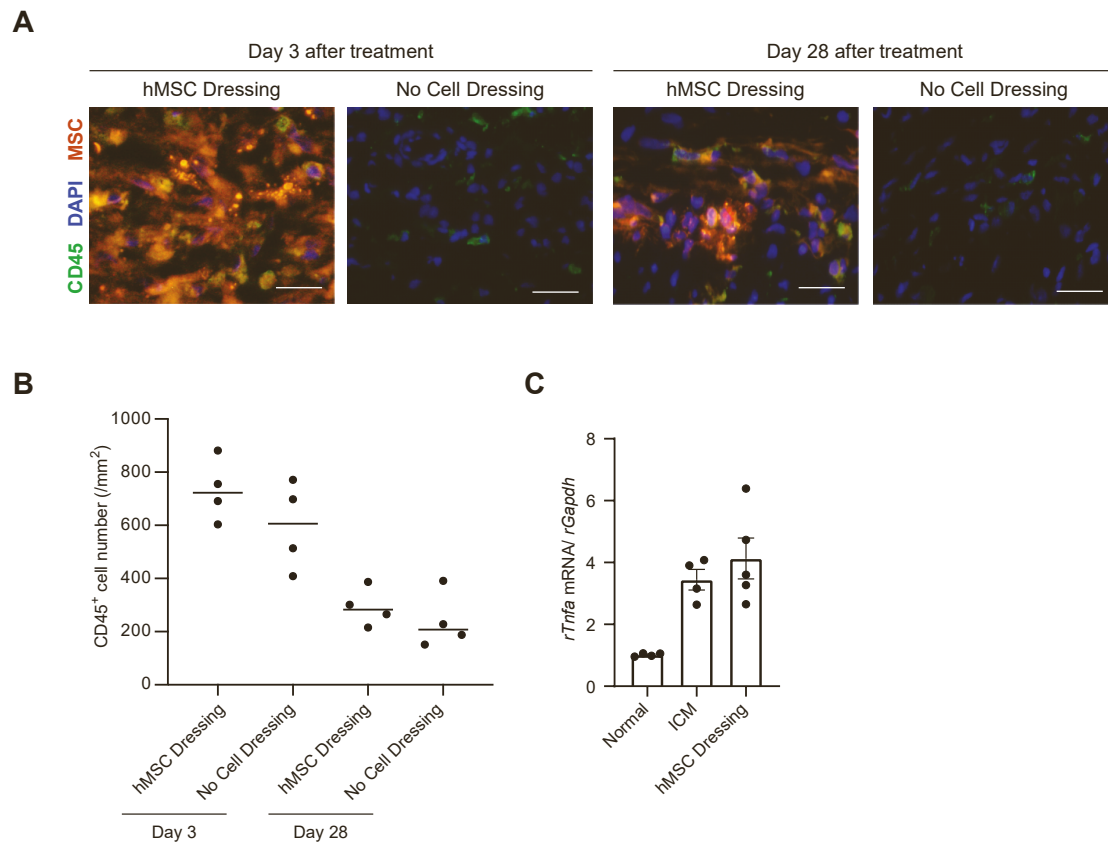

**Figure S1. Immunological response induced by hAM-MSC-dressing therapy.**

Four weeks after left coronary artery ligation in rats, a hAM-MSC-dressing (a fibrin sealant film containing  $2 \times 10^6$  hAM-MSCs; hMSC-dressing group), a fibrin sealant film only (No Cell-dressing group), or nothing (no treatment; ICM group) were placed onto the rat heart surface.

**(A)** Representative images of immunohistology for CD45 (green) with (DAPI; blue) staining exhibiting the CD45<sup>+</sup> cell accumulation in the construct of hAM-MSC-dressing or No Cell-dressing at day 3 and 28 after treatment. Scale bars = 20  $\mu$ m. n = 4 rats in each group.

**(B)** The graphs presenting the number of CD45<sup>+</sup> cells in the construct of hAM-MSC-dressing or No Cell-dressing at day 3 and 28 after treatment. n = 4 rats in each group.

(C) RT-qPCR analysis data showing increased expression of *rTnfa* genes of the rat LV samples of the hAM-MSc group, as compared to the ICM group, at day 3 post treatment. Normal (no MI, no treatment) group was included as a reference. n = 5 hearts in each group. Data are presented as mean  $\pm$  SEM, Student's t-test for statistical analysis of (B); One-way ANOVA with Tukey's post-hoc tests for (C).

**Figure S2**

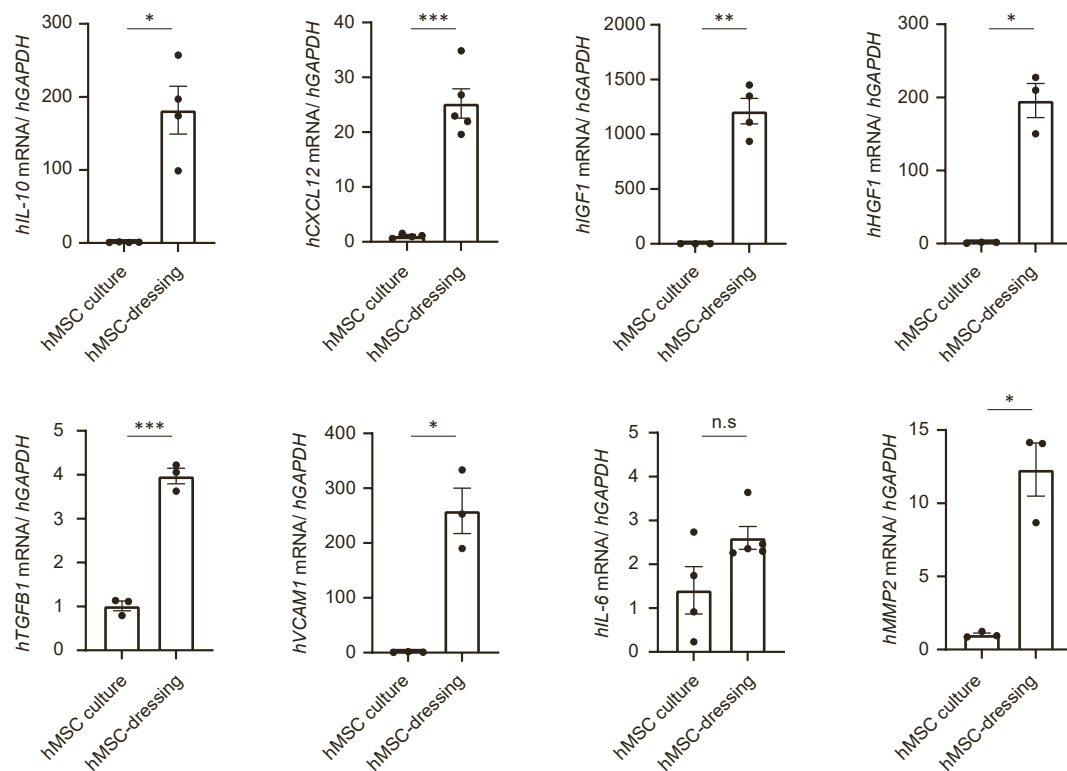

**Figure S2. Expression of human reparative genes in the rat heart post hAM-MSC-dressing therapy.**

Four weeks after left coronary artery ligation in rats, hAM-MSC-dressings (fibrin sealant film containing  $2 \times 10^6$  hAM-MSCs; hMSC-dressing group) were placed onto the heart surface. At day 3 post-transplantation, RNA was extracted from the rat LV tissue for RT-qPCR for tissue repair-related human genes. As a control, RNA was extracted from ordinarily cultured hAM-MSCs was used.  $n = 5$  in each group. Data are presented as mean  $\pm$  SEM, \* $p < 0.05$ ,

\*\* $p < 0.01$ , \*\*\* $p < 0.001$ , n.s = not significant. Student's t-test.

**Figure S3**

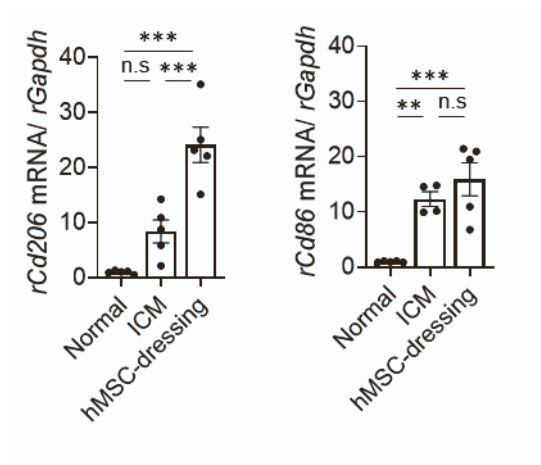

**Figure S3. Expression of  $M\phi$  phenotype markers in the rat heart post hAM-*MSC*-dressing therapy.**

Rat hearts were collected at Day 3 after hAM-*MSC*-dressing therapy or no treatment (ICM group) in a rat ICM model and subjected to RT-qPCR for *Cd206* and *Cd86*. Normal (no MI, no treatment) group was included as a reference.  $n = 5$  hearts in each group. Data are presented as mean  $\pm$  SEM, \*\* $p < 0.01$ , \*\*\* $p < 0.001$ , n.s = not significant. One-way ANOVA with Tukey's post-hoc test.

**Figure S4**

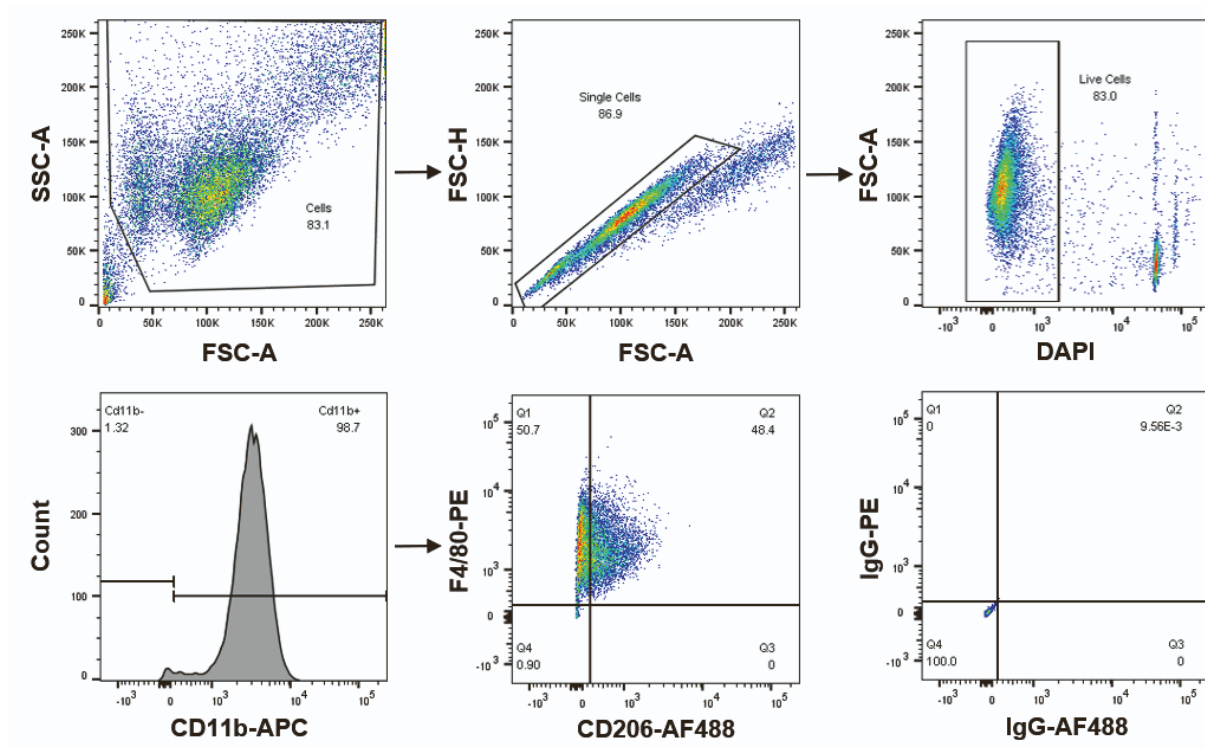

**Figure S4. Flow cytometry gating to characterize M2M $\phi$ .**

Gating strategy to detect M2M $\phi$  by flow cytometry is illustrated. Debris, doublets and dead cells are excluded. Cells double positive for F4/80 and CD206 within the CD11b<sup>+</sup> population were defined as M2M $\phi$  by flow cytometry. Representative dot plots from a sample of M-CSF + hAM-MSC treated mouse BM-MNCs are presented. The same cells stained with IgG conjugated fluorescent antibodies shown as negative control. FMO control also used.

**Figure S5**

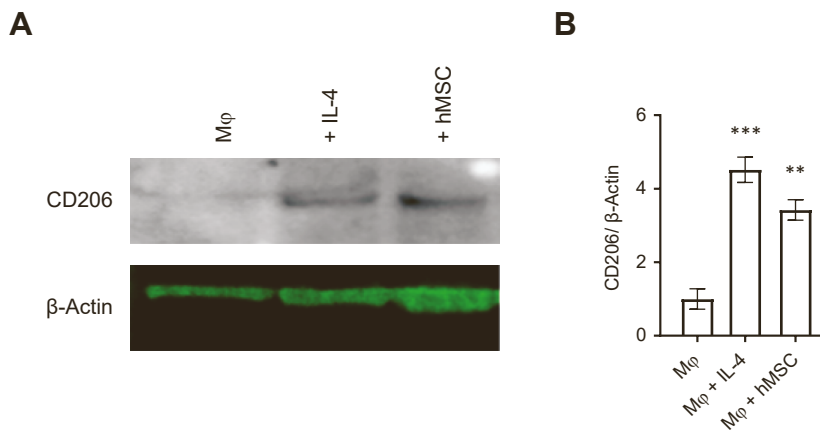

**Figure S5. Enhanced CD206 protein expression in Mφ by coculture with hAM-MSCs.**

Mouse bone marrow-derived Mφ were cultured alone, with IL-4 (20ng/ml) or hAM-MSCs in a non-contact co-culture model for 48 hours. Cells were collected and CD206 protein expression levels were analyzed by western blot technique.

**(A)** Representative blot showing higher CD206 expression in Mφ after IL-4 and hAM-MSC treatment compared to unstimulated Mφ. β-Actin was used as loading control.

**(B)** Quantification of CD206 expression. n = 3 animals. Data are presented as mean fold change ± SEM compared to Mφ, \*\*p < 0.01, \*\*\*p < 0.001, One-way ANOVA with Dunnett's post-hoc test.



**Figure S6**

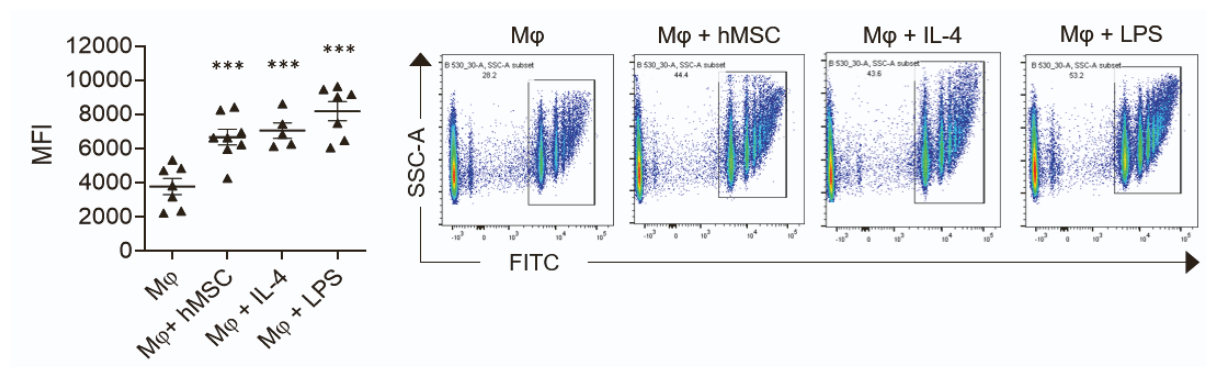

**Figure S6. Increased Mφ phagocytotic activity by co-culture with hAM-MSCs.**

Mouse bone marrow-derived Mφ were subjected to hAM-MSC transwell co-culture conditions before adding FITC-labelled beads in serum free media. Positive controls of LPS (50ng/ ml) or IL-4 (20ng/ ml) administration was included as well as an unstimulated (MCSF only) Mφ treatment group. Cells containing the FITC<sup>+</sup> beads were assessed by flow cytometry. The mean fluorescence intensity (MFI) was quantified (left graph). Representative flow cytometry images for each group are shown in the panel on the right. n = 5-7. Data are presented as mean ± SEM, \*\*\*p < 0.001 compared to Mφ, One-way ANOVA with Dunnett's post-hoc test.

**Figure S7**

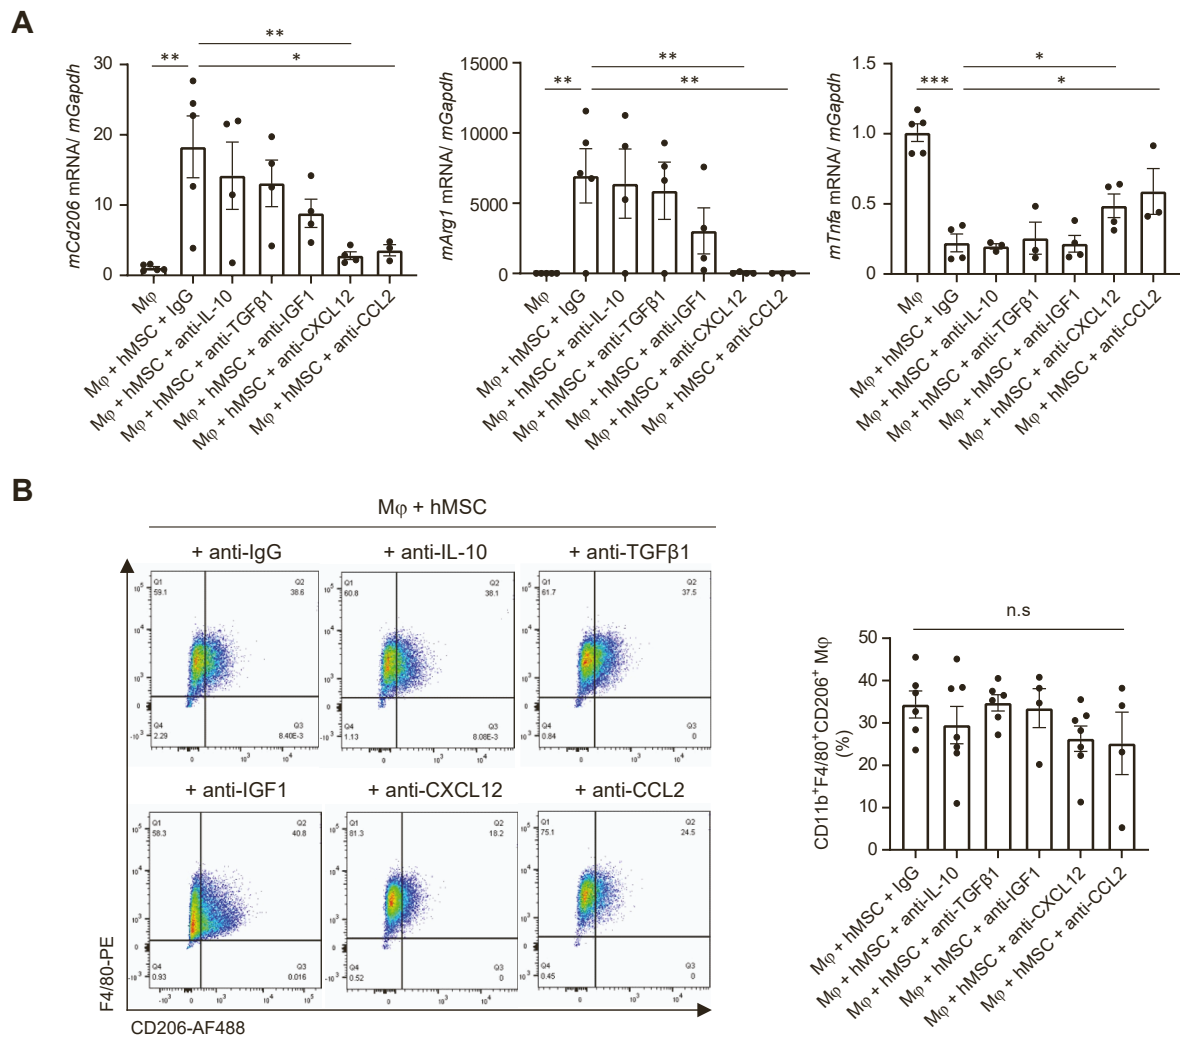

**Figure S7. Role of CXCL12 and CCL2 in hAM-MSC-induced M2Mφ polarization.**

Mouse bone marrow-derived Mφ were mono-cultured (Mφ group) or co-cultured with hAM-MSCs in the presence of neutralizing antibodies for human IL-10 (Mφ + hMSC + anti-IL-10), TGFβ1 (Mφ + hMSC + anti-TGFβ1), IGF1 (Mφ + hMSC + anti-IGF1), CXCL12 (Mφ + hMSC + anti-CXCL12) and CCL2 (Mφ + hMSC + anti-CCL2) or IgG antibody control (Mφ + hMSC + IgG). After 48 hours Mφ were collected and assessed for M2Mφ production.

**(A)** Gene expression of Mφ in each group measured by RT-qPCR. *Gapdh* was used as a reference gene. n = 4-5 biological replicates with 3 technical replicates.

**(B)** The percentage of M2Mφ (CD11b<sup>+</sup>F4/80<sup>+</sup>CD206<sup>+</sup>) to the total live cell population quantified by flow cytometry. Representative dot plots and a bar chart summarizing the data are presented. n = 4-8 in each group.

Data are presented as mean  $\pm$  SEM. \* $p < 0.05$ , \*\* $p < 0.01$ , \*\*\* $p < 0.001$ . One-way ANOVA with Dunnett's multiple comparisons test.

**Figure S8**

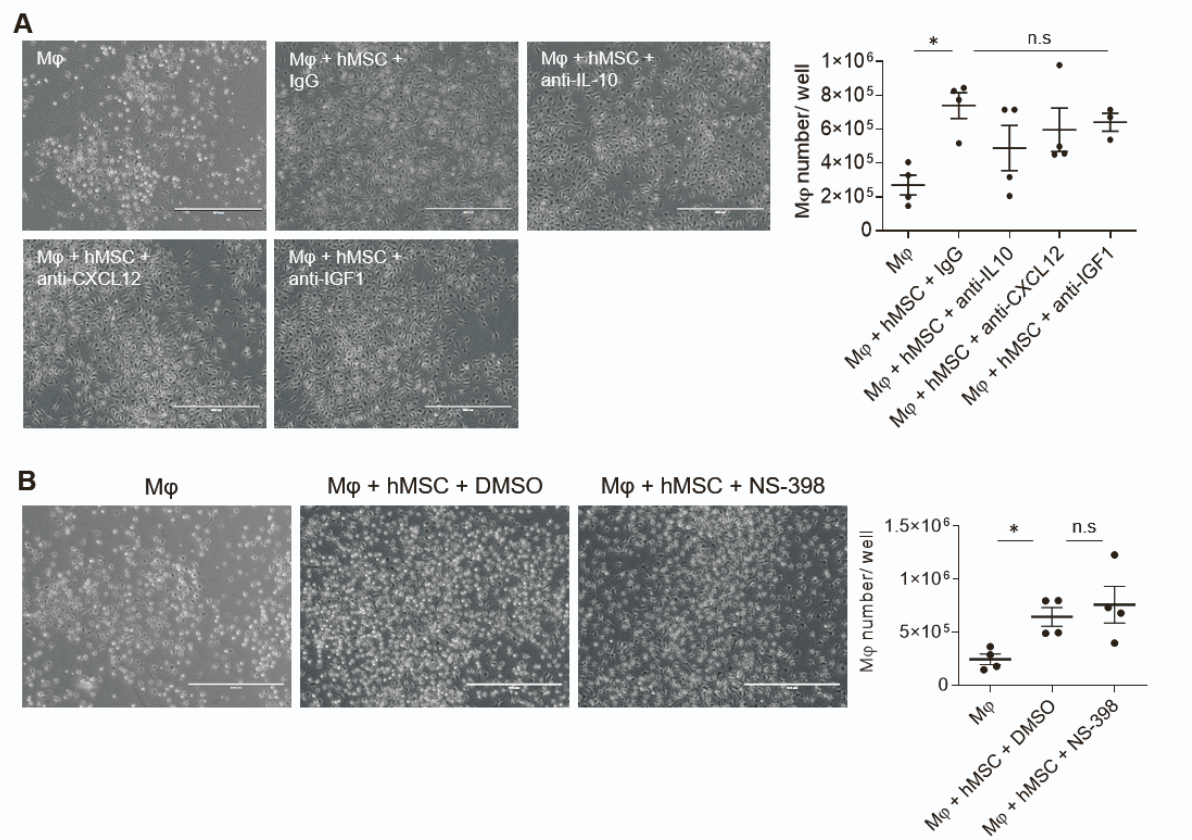

**Figure S8. Inhibition of hAM-MSC-secreted PGE2, IL-10, CXCL12 or IGF1 did not affect Mφ proliferation.**

(A) Mouse bone marrow-derived Mφ were co-cultured for 48 with hAM-MSCs in the presence of neutralizing antibodies for human IL-10 (Mφ + hMSC + anti-IL-10), IGF1 (Mφ + hMSC + anti-IGF1), CXCL12 (Mφ + hMSC + anti-CXCL12) or IgG antibody controls (Mφ + hMSC + IgG). Cells were collected and the numbers were quantified. Representative phase contrast images and a chart showing the cell number counted are presented. Scale bar = 400 μm. n=3-4 per group.

(B) Mouse bone marrow-derived Mφ were co-cultured for 48 with hAM-MSCs pre-treated with DMSO (vehicle control; Mφ + hMSC + DMSO group) or COX-2 inhibitor, NS-398, in DEMSO (Mφ + hMSC + NS-398 group). Representative phase contrast images and a chart showing the cell number counted are presented. Scale bar = 400 μm. n = 4 in each group.

Data are presented as mean  $\pm$  SEM. \* $p < 0.05$ ; n.s = not significant. One-way ANOVA with Dunnett's comparisons test.

**Table S1. Primer sequences**

| <b>Gene</b>    | <b>Primer Sequence</b>                                                                  |
|----------------|-----------------------------------------------------------------------------------------|
| <i>mArg1</i>   | Forward:5'-CAAGACAGGGCTCCTTTCAG-3'<br>Reverse: 5'-AAGCAAGCCAAGGTAAAGC-3'                |
| <i>mFizz1</i>  | Forward:5'-AGGAACTTCTTGCCAATCCA-3'<br>Reverse: 5'-ACAAGCACACCCAGTAGCAG-3'               |
| <i>mIl-10</i>  | Forward:5'-GGACAACATACTGCTAAAGGACTCCT-3'<br>Reverse: 5'-GCCTGGGGCATCACTTCTAC-3'         |
| <i>mTgfb1</i>  | Forward:5'-CCTATATTTGGAGCCTGGACACAC-3'<br>Reverse: 5'-GCTTGCGACCCACGTAGTAGA-3'          |
| <i>mIgf1</i>   | Forward:5'-GGACCGAGGGGCTTTTACTTC-3'<br>Reverse: 5'-GGCACAGTACATCTCCAGTCTCCTC-3'         |
| <i>mTnfa</i>   | Forward:5'-ATGGCCTCCCTCTGATCAGTT-3'<br>Reverse: 5'-TCTTTGAGATCCATGCCGTTG-3'             |
| <i>mCd206</i>  | Forward:5'-ACTACACACTCATCCATTACAACCAA-3'<br>Reverse: 5'-GGCACCTATCACAATCAGGAGGA-3'      |
| <i>mInos</i>   | Forward:5'- CTCCATGACTCCCAGCACAAA-3'<br>Reverse: 5'- CACTCTCTTGCGGACCATCTC-3'           |
| <i>mIl-1b</i>  | Forward:5'- CAAGCAACGACAAAATACCTGTG-3'<br>Reverse: 5'- ACCGTTTTTCCATCTTCTTCTTTGG-3'     |
| <i>mCd86</i>   | Forward:5'- GTTACTGTGGCCCTCCTCCTTGT-3'<br>Reverse: 5'- TGTCAGCGTTACTATCCCGCTCT-3'       |
| <i>rCxcl12</i> | Forward:5'- CTGGATAATGTGAGAACATGCCTAGAA-3'<br>Reverse: 5'- TGCAAAAGTCCAATTCCTCAA-3'     |
| <i>rVcam1</i>  | Forward:5'- CTGAGTGCAAGAAGCCAAGTAGAAA-3'<br>Reverse: 5'- CTACTACTCTAAACGACCTCGCAATGA-3' |
| <i>rIl-10</i>  | Forward:5'- CACCCGGCATCTACTGGACT-3'<br>Reverse: 5'- TATTTTGGAGAGAGGTACAAACGAGGT-3'      |
| <i>rIl-6</i>   | Forward:5'- GCCTAAGCATATCAGTTTGTGGACATT-3'<br>Reverse: 5'- AACATTCATATTGCCAGTTCTTCGT-3' |
| <i>rTgfb1</i>  | Forward:5'- GACTCTCCACCTGCAAGACCATC-3'<br>Reverse: 5'- GGACTGGCGAGCCTTAGTTTG-3'         |

|                |                                                                                                   |
|----------------|---------------------------------------------------------------------------------------------------|
| <i>rIl-4</i>   | Forward:5'- CTGTAGAGAGCTATTGATGGGTCTCAG-3'<br>Reverse: 5'- CTTTTTCTGTGACCTGGTTCAAAGTG-3'          |
| <i>rIgf1</i>   | Forward:5'- AAACAAATAGAATAACAATAACTATGACTTTGAGG-3'<br>Reverse: 5'- TTGAAGGAACCATTGAGAGTTTAAGAG-3' |
| <i>hCXCL12</i> | Forward:5'- CTTGTAATCCGAATCTCTTTTTTGCTTT-3'<br>Reverse: 5'- GCCCAAGGGAGTGTGTCAGGTAG-3'            |
| <i>hVCAM1</i>  | Forward:5'- TACTGCTCATCATTCCCTTGAGAAAAAC-3'<br>Reverse: 5'- GCTCACAGCAAGGGACATAGA-3'              |
| <i>hIL-10</i>  | Forward:5'- ACGCTTTCTAGCTGTTGAGCTGTTTT-3'<br>Reverse: 5'- GGCTCCCTGGTTTCTCTTCCT-3'                |
| <i>hIL-6</i>   | Forward:5'- ATGGGCACCTCAGATTGTTGTT-3'<br>Reverse: 5'- GTGTCCTAACGCTCATACTTTTAGTTC-3'              |
| <i>hTGFB1</i>  | Forward:5'- CTCATTCAGTCACCATAGCAACTC-3'<br>Reverse: 5'- CTTCTTCACTATCCCCACTAAAGCA-3'              |
| <i>hIL-4</i>   | Forward:5'- ACTGCTTCCCCCTCTGTTCT-3'<br>Reverse: 5'- CTTCTGCTCTGTGAGGCTGTT-3'                      |
| <i>hIGF1</i>   | Forward:5'- ACCACCTTTCAACTTTTTATCACTCAC-3'<br>Reverse: 5'- CAACAAAACAATGGAGCCTTCTAAC-3'           |
